# Supplementary material
Source: Frontiers journal article supplement (https://www.frontiersin.org/articles/353124)
Supplement: Data_Sheet_4.xls [file Data_Sheet_4.xls]

## Sheet: Sheet0
© 2000-2017 QIAGEN. All rights reserved.
Ingenuity Canonical Pathways	-log(p-value)	Ratio	Downregulated	Overlaps with dataset	Upregulated	No overlap with dataset	Molecules
Rac Signaling	3.5	0.148	0/115 (0%)	17/115 (15%)	0/115 (0%)	98/115 (85%)	PIK3C2B,ACTR2,TIAM1,PTK2B,FGFR1,PIP4K2B,WASF1,ANK1,CYFIP2,JUN,IRS1,BAIAP2,CD44,SH3RF1,IRS2,ELK4,PI4KA
Circadian Rhythm Signaling	3.44	0.25	0/32 (0%)	8/32 (25%)	0/32 (0%)	24/32 (75%)	PER1,GRIN1,GRIN2A,GRIN2D,BHLHE40,CRY2,VIP,PER2
Actin Cytoskeleton Signaling	3.41	0.119	0/219 (0%)	26/219 (12%)	0/219 (0%)	193/219 (88%)	ACTR2,PIK3C2B,MYH10,TIAM1,MYH9,MYH14,FGFR1,CRKL,ACTN2,PIP4K2B,TRIO,FGD1,WASF1,GIT1,SSH1,BCAR1,SLC9A1,PDGFB,DIAPH1,CYFIP2,FGF18,APC2,IRS1,BAIAP2,IRS2,MSN
Neuropathic Pain Signaling In Dorsal Horn Neurons	3.16	0.143	0/112 (0%)	16/112 (14%)	0/112 (0%)	96/112 (86%)	GRIN1,PIK3C2B,GRM2,GRIN2A,GRIN2D,GRIA1,FGFR1,PRKAR2A,PLCH2,FOS,CAMK2A,KCNQ2,IRS1,PRKCE,IRS2,CAMK2B
Axonal Guidance Signaling	3.02	0.0955	0/440 (0%)	42/440 (10%)	0/440 (0%)	398/440 (90%)	SLIT3,GLI2,UNC5A,ITSN1,SLIT1,BMP3,UNC5B,ABL1,SEMA6B,PLCH2,ROBO1,BCAR1,SEMA6C,GNG7,GNB1,SUFU,BAIAP2,ABLIM3,DCC,PRKCE,PLXNB2,ARHGEF11,SRGAP2,TUBB4A,IRS2,PIK3C2B,PLXNA1,ACTR2,KALRN,CRKL,FGFR1,PRKAR2A,GIT1,PDGFB,SEMA3A,SRGAP3,SEMA4D,IRS1,GNAO1,LINGO1,NFATC2,SEMA4B
Glutamate Receptor Signaling	2.91	0.179	0/56 (0%)	10/56 (18%)	0/56 (0%)	46/56 (82%)	GNB1,GRIN1,GRM2,GRIN2A,GRIK4,SLC17A7,GRIN2D,GRIA1,DLG4,GNG7
RAR Activation	2.6	0.113	0/186 (0%)	21/186 (11%)	0/186 (0%)	165/186 (89%)	ARID1A,DPF1,PRKAR2A,ADCY6,SMARCA4,FOS,TNIP1,JUN,MAPK14,TAF4,TGFB1,RARA,TGFB2,PRKCE,SMARCC2,NCOR2,PML,CRABP2,ZBTB16,CARM1,CITED2
Calcium Signaling	2.44	0.114	0/167 (0%)	19/167 (11%)	0/167 (0%)	148/167 (89%)	RAP2B,GRIN1,MYH10,GRIN2A,MYH9,GRIN2D,GRIA1,MYH14,PRKAR2A,ATP2A3,SLC8A2,ATP2B2,CABIN1,CAMK2A,ATP2B3,MEF2D,NFATC2,RYR1,CAMK2B
nNOS Signaling in Neurons	2.42	0.178	0/45 (0%)	8/45 (18%)	0/45 (0%)	37/45 (82%)	CAPN5,GRIN1,GRIN2A,CAMK2A,GRIN2D,PRKCE,DLG4,RASD1
UVB-Induced MAPK Signaling	2.41	0.154	0/65 (0%)	10/65 (15%)	0/65 (0%)	55/65 (85%)	TP53,PIK3C2B,FOS,MTOR,JUN,MAPK14,IRS1,FGFR1,PRKCE,IRS2
Amyotrophic Lateral Sclerosis Signaling	2.4	0.128	0/109 (0%)	14/109 (13%)	0/109 (0%)	95/109 (87%)	CAPN5,TP53,GRIN1,PIK3C2B,GRIN2A,GRIK4,IRS1,FGFR1,GRIA1,GRIN2D,CASP1,CACNA1C,IRS2,CACNA1A
Glioma Signaling	2.4	0.128	0/109 (0%)	14/109 (13%)	0/109 (0%)	95/109 (87%)	TP53,PIK3C2B,E2F4,FGFR1,ABL1,PDGFB,IDH1,MTOR,CAMK2A,IRS1,TGFA,PRKCE,IRS2,CAMK2B
Renal Cell Carcinoma Signaling	2.34	0.143	0/77 (0%)	11/77 (14%)	0/77 (0%)	66/77 (86%)	PIK3C2B,FOS,JUN,TGFB1,IRS1,FGFR1,HGF,TGFA,IRS2,PDGFB,ARNT
SAPK/JNK Signaling	2.31	0.13	0/100 (0%)	13/100 (13%)	0/100 (0%)	87/100 (87%)	TP53,PIK3C2B,DUSP8,CRKL,FGFR1,MAPK8IP3,GNG7,GNB1,MINK1,JUN,IRS1,IRS2,DUSP4
Netrin Signaling	2.26	0.184	0/38 (0%)	7/38 (18%)	0/38 (0%)	31/38 (82%)	UNC5A,ABLIM3,UNC5B,PRKAR2A,DCC,NFATC2,RYR1
B Cell Receptor Signaling	2.17	0.107	0/177 (0%)	19/177 (11%)	0/177 (0%)	158/177 (89%)	RAP2B,PIK3C2B,PTK2B,APBB1IP,EGR1,FGFR1,ABL1,BCL6,MTOR,CAMK2A,JUN,MAPK14,FOXO1,INPP5J,IRS1,NFATC2,IRS2,MAP2K3,CAMK2B
ErbB Signaling	2.08	0.126	0/95 (0%)	12/95 (13%)	0/95 (0%)	83/95 (87%)	PIK3C2B,FOS,MTOR,JUN,MAPK14,FOXO1,IRS1,FGFR1,TGFA,PRKCE,IRS2,MAP2K3
CREB Signaling in Neurons	2.07	0.105	0/181 (0%)	19/181 (10%)	0/181 (0%)	162/181 (90%)	GRIN1,PIK3C2B,GRIN2A,GRM2,GRIN2D,GRIA1,FGFR1,ADCY6,PRKAR2A,PLCH2,GNG7,GNB1,CAMK2A,GRIK4,IRS1,GNAO1,PRKCE,IRS2,CAMK2B
Aryl Hydrocarbon Receptor Signaling	2.01	0.113	0/133 (0%)	15/133 (11%)	0/133 (0%)	118/133 (89%)	TP53,CCNE2,NFIX,NFIC,TP73,SMARCA4,ARNT,FOS,JUN,TGFB1,RARA,GSTM4,TGFB2,NCOR2,MGST3
Nitric Oxide Signaling in the Cardiovascular System	2	0.119	0/109 (0%)	13/109 (12%)	0/109 (0%)	96/109 (88%)	PIK3C2B,IRS1,FGFR1,CAV1,PRKAR2A,CACNA1C,PRKCE,SLC7A1,ATP2A3,IRS2,PRKG2,CHRM1,CACNA1A
AMPK Signaling	1.97	0.103	0/185 (0%)	19/185 (10%)	0/185 (0%)	166/185 (90%)	PIK3C2B,ARID1A,DPF1,FGFR1,PRKAR2A,PFKL,FOXG1,SMARCA4,ADRA1D,MTOR,AK5,MAPK14,FOXO1,FOXO6,IRS1,FASN,IRS2,MAP2K3,SMARCC2
Remodeling of Epithelial Adherens Junctions	1.97	0.141	0/64 (0%)	9/64 (14%)	0/64 (0%)	55/64 (86%)	DNM1,ACTR2,ACTN2,HGF,CBLL1,ZYX,TUBB4A,HGS,MAPRE3
Role of NFAT in Cardiac Hypertrophy	1.93	0.102	0/187 (0%)	19/187 (10%)	0/187 (0%)	168/187 (90%)	PIK3C2B,FGFR1,PRKAR2A,ADCY6,SLC8A2,PLCH2,GNG7,CABIN1,GNB1,CAMK2A,MAPK14,TGFB1,IRS1,MEF2D,TGFB2,PRKCE,IRS2,MAP2K3,CAMK2B
Molecular Mechanisms of Cancer	1.89	0.0874	0/366 (0%)	32/366 (9%)	0/366 (0%)	334/366 (91%)	RAP2B,BMP3,ABL1,SYNGAP1,RASGRF1,JUN,CAMK2A,TGFB1,SUFU,TGFB2,PRKCE,ARHGEF11,IRS2,ARHGEF2,CAMK2B,TP53,PIK3C2B,LRP5,CCNE2,E2F4,FGFR1,PRKAR2A,ADCY6,ARHGEF17,FOS,MAPK14,FOXO1,IRS1,GNAO1,MAP2K3,LRP1,FNBP1
Acute Myeloid Leukemia Signaling	1.84	0.122	0/90 (0%)	11/90 (12%)	0/90 (0%)	79/90 (88%)	KITLG,PIK3C2B,MTOR,IRS1,FGFR1,RARA,KIT,IRS2,MAP2K3,PML,IDH1
PDGF Signaling	1.84	0.122	0/90 (0%)	11/90 (12%)	0/90 (0%)	79/90 (88%)	PIK3C2B,FOS,JUN,INPP5J,IRS1,CRKL,FGFR1,CAV1,ABL1,IRS2,PDGFB
Wnt/β-catenin Signaling	1.83	0.103	0/165 (0%)	17/165 (10%)	0/165 (0%)	148/165 (90%)	TP53,LRP5,PPARD,SOX12,MARK2,DKKL1,BCL9,JUN,APC2,TGFB1,RARA,GNAO1,CD44,TLE3,TGFB2,SOX8,LRP1
Calcium Transport I	1.77	0.3	0/10 (0%)	3/10 (30%)	0/10 (0%)	7/10 (70%)	ATP2B3,ATP2A3,ATP2B2
Pregnenolone Biosynthesis	1.77	0.3	0/10 (0%)	3/10 (30%)	0/10 (0%)	7/10 (70%)	CYP26B1,MICAL2,MICAL3
Calcium-induced T Lymphocyte Apoptosis	1.75	0.138	0/58 (0%)	8/58 (14%)	0/58 (0%)	50/58 (86%)	HLA-A,MEF2D,NR4A1,PRKCE,HLA-DOB,NFATC2,ATP2A3,CABIN1
Breast Cancer Regulation by Stathmin1	1.73	0.0969	0/196 (0%)	19/196 (10%)	0/196 (0%)	177/196 (90%)	TP53,PIK3C2B,CCNE2,E2F4,FGFR1,PRKAR2A,ADCY6,ARHGEF17,GNG7,GNB1,CAMK2A,PPP1R10,IRS1,PRKCE,IRS2,TUBB4A,ARHGEF2,ARHGEF11,CAMK2B
p53 Signaling	1.69	0.112	0/107 (0%)	12/107 (11%)	0/107 (0%)	95/107 (89%)	TP53,PIK3C2B,JUN,MAPK14,TP73,IRS1,PPP1R13B,FGFR1,ADGRB1,IRS2,PML,TP53BP2
Signaling by Rho Family GTPases	1.66	0.0917	0/240 (0%)	22/240 (9%)	0/240 (0%)	218/240 (91%)	ACTR2,PIK3C2B,PTK2B,SEPT9,FGFR1,PIP4K2B,WASF1,ARHGEF17,SLC9A1,GNG7,GNB1,FOS,JUN,IRS1,GNAO1,BAIAP2,IRS2,ARHGEF2,ARHGEF11,FNBP1,PI4KA,MSN
Cardiac Hypertrophy Signaling	1.63	0.0921	0/228 (0%)	21/228 (9%)	0/228 (0%)	207/228 (91%)	PIK3C2B,FGFR1,ADCY6,PRKAR2A,CACNA1C,PLCH2,CACNA1A,GNG7,ADRA1D,GNB1,MTOR,MAPK14,JUN,TGFB1,IRS1,MEF2D,GNAO1,TGFB2,IRS2,MAP2K3,FNBP1
DNA Methylation and Transcriptional Repression Signaling	1.59	0.2	0/20 (0%)	4/20 (20%)	0/20 (0%)	16/20 (80%)	CHD3,MTA1,CHD4,SAP130
Huntington's Disease Signaling	1.56	0.0905	0/232 (0%)	21/232 (9%)	0/232 (0%)	211/232 (91%)	TP53,CAPN5,PIK3C2B,PACSIN1,FGFR1,HSPA1A/HSPA1B,RPH3A,GNG7,DNM1,GNB1,MTOR,JUN,TAF4,CPLX2,IRS1,CASP1,PRKCE,DCTN1,DLG4,IRS2,NCOR2
Docosahexaenoic Acid (DHA) Signaling	1.54	0.135	0/52 (0%)	7/52 (13%)	0/52 (0%)	45/52 (87%)	PIK3C2B,FOXO1,IRS1,FGFR1,IRS2,PNPLA2,APP
Role of p14/p19ARF in Tumor Suppression	1.54	0.146	0/41 (0%)	6/41 (15%)	0/41 (0%)	35/41 (85%)	TP53,PIK3C2B,IRS1,FGFR1,SF3A1,IRS2
Trehalose Degradation II (Trehalase)	1.53	0.4	0/5 (0%)	2/5 (40%)	0/5 (0%)	3/5 (60%)	HK1,HK2
UVA-Induced MAPK Signaling	1.51	0.109	0/101 (0%)	11/101 (11%)	0/101 (0%)	90/101 (89%)	TP53,PIK3C2B,FOS,MTOR,JUN,MAPK14,IRS1,FGFR1,IRS2,PLCH2,SMPD3
Epithelial Adherens Junction Signaling	1.5	0.1	0/140 (0%)	14/140 (10%)	0/140 (0%)	126/140 (90%)	MYH10,ACTR2,MYH9,MYO7A,ACTN2,FGFR1,MYH14,WASF1,HGF,BAIAP2,TGFB2,ZYX,NECTIN1,TUBB4A
UVC-Induced MAPK Signaling	1.49	0.143	0/42 (0%)	6/42 (14%)	0/42 (0%)	36/42 (86%)	TP53,FOS,JUN,MAPK14,PRKCE,SMPD3
CD40 Signaling	1.48	0.117	0/77 (0%)	9/77 (12%)	0/77 (0%)	68/77 (88%)	PIK3C2B,FOS,TRAF3,JUN,MAPK14,IRS1,FGFR1,IRS2,MAP2K3
14-3-3-mediated Signaling	1.47	0.102	0/128 (0%)	13/128 (10%)	0/128 (0%)	115/128 (90%)	PIK3C2B,YWHAG,YWHAE,TP73,FGFR1,PLCH2,FOS,JUN,FOXO1,IRS1,PRKCE,TUBB4A,IRS2
IGF-1 Signaling	1.45	0.107	0/103 (0%)	11/103 (11%)	0/103 (0%)	92/103 (89%)	PIK3C2B,FOS,YWHAG,JUN,CTGF,FOXO1,YWHAE,IRS1,FGFR1,PRKAR2A,IRS2
Histidine Degradation VI	1.45	0.231	0/13 (0%)	3/13 (23%)	0/13 (0%)	10/13 (77%)	CYP26B1,MICAL2,MICAL3
Role of Osteoblasts, Osteoclasts and Chondrocytes in Rheumatoid Arthritis	1.42	0.0885	0/226 (0%)	20/226 (9%)	0/226 (0%)	206/226 (91%)	PIK3C2B,LRP5,CTSK,SPP1,PTK2B,IL1RAPL2,BMP3,FGFR1,DKKL1,FOS,JUN,MAPK14,FOXO1,TGFB1,APC2,IRS1,NFATC2,IRS2,MAP2K3,LRP1
Reelin Signaling in Neurons	1.41	0.109	0/92 (0%)	10/92 (11%)	0/92 (0%)	82/92 (89%)	PIK3C2B,IRS1,CRKL,FGFR1,IRS2,ARHGEF2,ARHGEF11,MAPK8IP3,DAB1,APP
Synaptic Long Term Potentiation	1.4	0.102	0/118 (0%)	12/118 (10%)	0/118 (0%)	106/118 (90%)	GRIN1,GRM2,GRIN2A,CAMK2A,PPP1R10,GRIN2D,GRIA1,PRKAR2A,PRKCE,CACNA1C,PLCH2,CAMK2B
EGF Signaling	1.38	0.118	0/68 (0%)	8/68 (12%)	0/68 (0%)	60/68 (88%)	PIK3C2B,FOS,MTOR,JUN,MAPK14,IRS1,FGFR1,IRS2
IL-3 Signaling	1.33	0.11	0/82 (0%)	9/82 (11%)	0/82 (0%)	73/82 (89%)	PIK3C2B,FOS,JUN,FOXO1,IRS1,CRKL,FGFR1,PRKCE,IRS2
CXCR4 Signaling	1.32	0.0926	0/162 (0%)	15/162 (9%)	0/162 (0%)	147/162 (91%)	PIK3C2B,FGFR1,EGR1,ADCY6,BCAR1,GNG7,GNB1,FOS,JUN,IRS1,GNAO1,PRKCE,IRS2,ARHGEF11,FNBP1
IL-4 Signaling	1.31	0.108	0/83 (0%)	9/83 (11%)	0/83 (0%)	74/83 (89%)	PIK3C2B,MTOR,INPP5J,HLA-A,IRS1,FGFR1,HLA-DOB,NFATC2,IRS2
Cellular Effects of Sildenafil (Viagra)	1.29	0.0976	0/123 (0%)	12/123 (10%)	0/123 (0%)	111/123 (90%)	CACNG2,MYH10,KCNQ2,MYH9,MYH14,PDE4A,PRKAR2A,ADCY6,CACNA1C,PRKG2,PLCH2,CACNA1A
LPS-stimulated MAPK Signaling	1.28	0.107	0/84 (0%)	9/84 (11%)	0/84 (0%)	75/84 (89%)	PIK3C2B,FOS,JUN,MAPK14,IRS1,FGFR1,PRKCE,IRS2,MAP2K3
Virus Entry via Endocytic Pathways	1.28	0.103	0/97 (0%)	10/97 (10%)	0/97 (0%)	87/97 (90%)	DNM1,PIK3C2B,ITSN1,HLA-A,IRS1,FGFR1,CAV1,ABL1,PRKCE,IRS2
Cholecystokinin/Gastrin-mediated Signaling	1.28	0.103	0/97 (0%)	10/97 (10%)	0/97 (0%)	87/97 (90%)	FOS,JUN,MAPK14,PTK2B,MEF2D,PRKCE,MAP2K3,MAPK7,BCAR1,FNBP1
GNRH Signaling	1.26	0.0968	0/124 (0%)	12/124 (10%)	0/124 (0%)	112/124 (90%)	DNM1,FOS,JUN,MAPK14,CAMK2A,EGR1,PRKAR2A,ADCY6,PRKCE,MAP2K3,MAPK7,CAMK2B
Estrogen Receptor Signaling	1.24	0.096	0/125 (0%)	12/125 (10%)	0/125 (0%)	113/125 (90%)	PELP1,TAF4,MED15,TRRAP,SPEN,TAF3,NCOR2,MED13L,MED12,CARM1,SMARCA4,TAF15
Anandamide Degradation	1.24	1	0/1 (0%)	1/1 (100%)	0/1 (0%)	0/1 (0%)	FAAH
Notch Signaling	1.22	0.135	0/37 (0%)	5/37 (14%)	0/37 (0%)	32/37 (86%)	MAML1,FURIN,MAML3,NUMBL,RFNG
Antiproliferative Role of TOB in T Cell Signaling	1.22	0.154	0/26 (0%)	4/26 (15%)	0/26 (0%)	22/26 (85%)	CCNE2,TGFB1,TGFB2,TOB1
Protein Kinase A Signaling	1.22	0.0782	0/371 (0%)	29/371 (8%)	0/371 (0%)	342/371 (92%)	ANAPC2,MYH10,DUSP8,PTK2B,PDE4A,PLCH2,GNG7,AKAP2,GNB1,DUSP5,CAMK2A,PPP1R10,TGFB1,H1FX,TGFB2,DCC,PRKCE,RYR1,PDE11A,PTPRN,CAMK2B,YWHAG,YWHAE,ADCY6,PRKAR2A,PTPRU,PTPRS,NFATC2,DUSP4
Cell Cycle: G1/S Checkpoint Regulation	1.22	0.115	0/61 (0%)	7/61 (11%)	0/61 (0%)	54/61 (89%)	TP53,CCNE2,E2F4,FOXO1,TGFB1,ABL1,TGFB2
Integrin Signaling	1.2	0.0853	0/211 (0%)	18/211 (9%)	0/211 (0%)	193/211 (91%)	RAP2B,CAPN5,ACTR2,PIK3C2B,FGFR1,CRKL,ACTN2,ABL1,TNK2,GIT1,BCAR1,PDGFB,ARF3,IRS1,CAV1,ZYX,IRS2,FNBP1
April Mediated Signaling	1.18	0.132	0/38 (0%)	5/38 (13%)	0/38 (0%)	33/38 (87%)	FOS,TRAF3,JUN,MAPK14,NFATC2
IL-12 Signaling and Production in Macrophages	1.18	0.0938	0/128 (0%)	12/128 (9%)	0/128 (0%)	116/128 (91%)	PIK3C2B,FOS,LYZ,JUN,MAPK14,TGFB1,IRS1,FGFR1,ZNF668,TGFB2,PRKCE,IRS2
Thrombin Signaling	1.16	0.0854	0/199 (0%)	17/199 (9%)	0/199 (0%)	182/199 (91%)	PIK3C2B,FGFR1,ADCY6,PLCH2,GATA2,GNG7,GNB1,CAMK2A,MAPK14,IRS1,GNAO1,PRKCE,IRS2,ARHGEF2,ARHGEF11,FNBP1,CAMK2B
Colorectal Cancer Metastasis Signaling	1.15	0.0823	0/243 (0%)	20/243 (8%)	0/243 (0%)	223/243 (92%)	TP53,PIK3C2B,LRP5,E2F4,PTGER3,FGFR1,PRKAR2A,ADCY6,GNG7,GNB1,FOS,JUN,TGFB1,IRS1,DCC,TGFB2,IRS2,FNBP1,MMP17,LRP1
IL-1 Signaling	1.15	0.101	0/89 (0%)	9/89 (10%)	0/89 (0%)	80/89 (90%)	GNB1,FOS,JUN,MAPK14,GNAO1,PRKAR2A,ADCY6,MAP2K3,GNG7
Ubiquinol-10 Biosynthesis (Eukaryotic)	1.15	0.176	0/17 (0%)	3/17 (18%)	0/17 (0%)	14/17 (82%)	CYP26B1,MICAL2,MICAL3
MIF Regulation of Innate Immunity	1.14	0.128	0/39 (0%)	5/39 (13%)	0/39 (0%)	34/39 (87%)	TP53,PLA2G4A,FOS,JUN,PLA2G2D
Nur77 Signaling in T Lymphocytes	1.14	0.118	0/51 (0%)	6/51 (12%)	0/51 (0%)	45/51 (88%)	HLA-A,MEF2D,NR4A1,HLA-DOB,MAPK7,CABIN1
P2Y Purigenic Receptor Signaling Pathway	1.14	0.0923	0/130 (0%)	12/130 (9%)	0/130 (0%)	118/130 (91%)	GNB1,PIK3C2B,FOS,JUN,IRS1,FGFR1,PRKAR2A,ADCY6,PRKCE,IRS2,PLCH2,GNG7
Cardiac β-adrenergic Signaling	1.14	0.0923	0/130 (0%)	12/130 (9%)	0/130 (0%)	118/130 (91%)	GNB1,AKAP2,PPP1R10,PDE4A,PRKAR2A,ADCY6,CACNA1C,ATP2A3,SLC8A2,PDE11A,GNG7,CACNA1A
Dopamine-DARPP32 Feedback in cAMP Signaling	1.14	0.0886	0/158 (0%)	14/158 (9%)	0/158 (0%)	144/158 (91%)	KCNJ8,GRIN1,GRIN2A,PPP1R10,GRIN2D,PRKAR2A,ADCY6,CACNA1C,PRKCE,ATP2A3,PRKG2,PLCH2,CACNA1A,KCNJ11
Chronic Myeloid Leukemia Signaling	1.13	0.0971	0/103 (0%)	10/103 (10%)	0/103 (0%)	93/103 (90%)	TP53,PIK3C2B,E2F4,TGFB1,IRS1,CRKL,FGFR1,ABL1,TGFB2,IRS2
GDP-glucose Biosynthesis	1.13	0.25	0/8 (0%)	2/8 (25%)	0/8 (0%)	6/8 (75%)	HK1,HK2
IL-2 Signaling	1.13	0.109	0/64 (0%)	7/64 (11%)	0/64 (0%)	57/64 (89%)	PIK3C2B,FOS,JUN,PTK2B,IRS1,FGFR1,IRS2
FGF Signaling	1.13	0.1	0/90 (0%)	9/90 (10%)	0/90 (0%)	81/90 (90%)	PIK3C2B,MAPK14,FGF18,IRS1,CRKL,FGFR1,HGF,IRS2,MAP2K3
Sonic Hedgehog Signaling	1.12	0.143	0/28 (0%)	4/28 (14%)	0/28 (0%)	24/28 (86%)	DYRK1B,GLI2,SUFU,PRKAR2A
RhoA Signaling	1.12	0.094	0/117 (0%)	11/117 (9%)	0/117 (0%)	106/117 (91%)	PLXNA1,ACTR2,SEPT9,PTK2B,PLEKHG5,BAIAP2,PIP4K2B,ARHGEF11,WASF1,PI4KA,MSN
B Cell Activating Factor Signaling	1.1	0.125	0/40 (0%)	5/40 (13%)	0/40 (0%)	35/40 (88%)	FOS,TRAF3,JUN,MAPK14,NFATC2
Renin-Angiotensin Signaling	1.1	0.0932	0/118 (0%)	11/118 (9%)	0/118 (0%)	107/118 (91%)	PIK3C2B,FOS,JUN,MAPK14,PTK2B,IRS1,FGFR1,PRKAR2A,ADCY6,PRKCE,IRS2
CCR5 Signaling in Macrophages	1.1	0.108	0/65 (0%)	7/65 (11%)	0/65 (0%)	58/65 (89%)	GNB1,FOS,JUN,MAPK14,PTK2B,PRKCE,GNG7
Thrombopoietin Signaling	1.1	0.108	0/65 (0%)	7/65 (11%)	0/65 (0%)	58/65 (89%)	PIK3C2B,FOS,JUN,IRS1,FGFR1,PRKCE,IRS2
VDR/RXR Activation	1.1	0.103	0/78 (0%)	8/78 (10%)	0/78 (0%)	70/78 (90%)	LRP5,SPP1,FOXO1,PPARD,MXD1,TGFB2,PRKCE,NCOR2
Tight Junction Signaling	1.08	0.087	0/161 (0%)	14/161 (9%)	0/161 (0%)	147/161 (91%)	MYH10,TIAM1,MYH9,HSF1,MYH14,MARK2,PRKAR2A,FOS,JUN,TGFB1,TGFB2,SAFB,ARHGEF2,NECTIN1
Sphingosine-1-phosphate Signaling	1.08	0.0924	0/119 (0%)	11/119 (9%)	0/119 (0%)	108/119 (91%)	PIK3C2B,PTK2B,IRS1,FGFR1,CASP1,ADCY6,IRS2,PLCH2,SMPD3,PDGFB,FNBP1
Relaxin Signaling	1.06	0.0878	0/148 (0%)	13/148 (9%)	0/148 (0%)	135/148 (91%)	GNB1,FOS,PIK3C2B,JUN,IRS1,FGFR1,GNAO1,ADCY6,PRKAR2A,PDE4A,IRS2,PDE11A,GNG7
ERK/MAPK Signaling	1.06	0.0838	0/191 (0%)	16/191 (8%)	0/191 (0%)	175/191 (92%)	PIK3C2B,YWHAG,PTK2B,CRKL,FGFR1,PRKAR2A,BCAR1,KSR1,FOS,PLA2G4A,PPP1R10,PLA2G2D,IRS1,PRKCE,IRS2,DUSP4
Corticotropin Releasing Hormone Signaling	1.05	0.0935	0/107 (0%)	10/107 (9%)	0/107 (0%)	97/107 (91%)	FOS,JUN,GLI2,MAPK14,MEF2D,GNAO1,PRKAR2A,ADCY6,NR4A1,PRKCE
EIF2 Signaling	1.04	0.0821	0/207 (0%)	17/207 (8%)	0/207 (0%)	190/207 (92%)	PIK3C2B,FGFR1,EIF5B,RPS18,EIF4G3,RPL12,EIF4G1,RPL37A,RPL27,RPS4Y1,RPS16,IRS1,CDK11A,RPL10,IRS2,AGO1,RPL38
Glucose and Glucose-1-phosphate Degradation	1.04	0.222	0/9 (0%)	2/9 (22%)	0/9 (0%)	7/9 (78%)	HK1,HK2
Heme Biosynthesis II	1.04	0.222	0/9 (0%)	2/9 (22%)	0/9 (0%)	7/9 (78%)	ALAS2,CPOX
TR/RXR Activation	1.03	0.0957	0/94 (0%)	9/94 (10%)	0/94 (0%)	85/94 (90%)	PIK3C2B,MTOR,NXPH2,IRS1,FGFR1,FASN,SYT2,IRS2,NCOR2
Prostate Cancer Signaling	1.03	0.0957	0/94 (0%)	9/94 (10%)	0/94 (0%)	85/94 (90%)	TP53,PIK3C2B,MTOR,CCNE2,FOXO1,IRS1,FGFR1,ABL1,IRS2
Germ Cell-Sertoli Cell Junction Signaling	1.02	0.0848	0/165 (0%)	14/165 (8%)	0/165 (0%)	151/165 (92%)	PIK3C2B,MAPK14,TGFB1,IRS1,MYO7A,ACTN2,FGFR1,TGFB2,ZYX,IRS2,TUBB4A,MAP2K3,BCAR1,FNBP1
Melatonin Signaling	1.02	0.103	0/68 (0%)	7/68 (10%)	0/68 (0%)	61/68 (90%)	CAMK2A,GNAO1,PRKAR2A,PRKCE,MAP2K3,PLCH2,CAMK2B
Role of Macrophages, Fibroblasts and Endothelial Cells in Rheumatoid Arthritis	1.01	0.0769	0/299 (0%)	23/299 (8%)	0/299 (0%)	276/299 (92%)	PIK3C2B,LRP5,TRAF3,IL1RAPL2,FGFR1,DKKL1,PLCH2,PDGFB,IL16,FOS,JUN,CAMK2A,MAPK14,APC2,TGFB1,IRS1,GNAO1,PRKCE,NFATC2,IRS2,MAP2K3,LRP1,CAMK2B
Endothelin-1 Signaling	0.995	0.0829	0/181 (0%)	15/181 (8%)	0/181 (0%)	166/181 (92%)	PLA2G4A,FOS,PIK3C2B,MAPK14,JUN,PLA2G2D,IRS1,FGFR1,GNAO1,CASP1,ADCY6,PRKCE,IRS2,MAPK7,PLCH2
CDK5 Signaling	0.991	0.0938	0/96 (0%)	9/96 (9%)	0/96 (0%)	87/96 (91%)	FOSB,MAPK14,PPP1R10,EGR1,PRKAR2A,ADCY6,ABL1,MAPK7,CACNA1A
RhoGDI Signaling	0.987	0.0838	0/167 (0%)	14/167 (8%)	0/167 (0%)	153/167 (92%)	ACTR2,PIP4K2B,WASF1,ARHGEF17,GNG7,GNB1,GNAO1,CD44,ARHGDIA,ARHGEF2,ARHGEF11,PI4KA,FNBP1,MSN
Systemic Lupus Erythematosus Signaling	0.98	0.0824	0/182 (0%)	15/182 (8%)	0/182 (0%)	167/182 (92%)	PIK3C2B,LSM14B,HLA-A,PRPF3,FGFR1,SART1,FOS,RNPC3,MTOR,JUN,IRS1,SNRPB2,SF3B4,NFATC2,IRS2
JAK/Stat Signaling	0.976	0.0964	0/83 (0%)	8/83 (10%)	0/83 (0%)	75/83 (90%)	PIK3C2B,FOS,MTOR,JUN,IRS1,FGFR1,CISH,IRS2
PKCθ Signaling in T Lymphocytes	0.97	0.088	0/125 (0%)	11/125 (9%)	0/125 (0%)	114/125 (91%)	PIK3C2B,FOS,JUN,CAMK2A,HLA-A,IRS1,FGFR1,HLA-DOB,NFATC2,IRS2,CAMK2B
Myc Mediated Apoptosis Signaling	0.966	0.1	0/70 (0%)	7/70 (10%)	0/70 (0%)	63/70 (90%)	TP53,PIK3C2B,YWHAG,YWHAE,IRS1,FGFR1,IRS2
NRF2-mediated Oxidative Stress Response	0.965	0.082	0/183 (0%)	15/183 (8%)	0/183 (0%)	168/183 (92%)	PIK3C2B,FGFR1,JUNB,FOS,JUN,MAPK14,IRS1,GSTM4,PRKCE,IRS2,MAP2K3,MAPK7,ENC1,DNAJB5,MGST3
PPARα/RXRα Activation	0.956	0.0828	0/169 (0%)	14/169 (8%)	0/169 (0%)	155/169 (92%)	MAPK14,JUN,CHD5,IL1RAPL2,TGFB1,FASN,IRS1,TGFB2,ADCY6,PRKAR2A,MAP2K3,NCOR2,PLCH2,MED12
Small Cell Lung Cancer Signaling	0.954	0.0952	0/84 (0%)	8/84 (10%)	0/84 (0%)	76/84 (90%)	TP53,PIK3C2B,TRAF3,CCNE2,IRS1,FGFR1,ABL1,IRS2
Leptin Signaling in Obesity	0.954	0.0952	0/84 (0%)	8/84 (10%)	0/84 (0%)	76/84 (90%)	PIK3C2B,FOXO1,IRS1,FGFR1,PRKAR2A,ADCY6,IRS2,PLCH2
HIPPO signaling	0.954	0.0952	0/84 (0%)	8/84 (10%)	0/84 (0%)	76/84 (90%)	YWHAG,DLG5,PPP1R10,YWHAE,CD44,DLG4,DLG3,TP53BP2
HMGB1 Signaling	0.952	0.0873	0/126 (0%)	11/126 (9%)	0/126 (0%)	115/126 (91%)	PIK3C2B,FOS,JUN,MAPK14,TGFB1,IRS1,FGFR1,TGFB2,IRS2,MAP2K3,FNBP1
Palmitate Biosynthesis I (Animals)	0.95	0.5	0/2 (0%)	1/2 (50%)	0/2 (0%)	1/2 (50%)	FASN
Fatty Acid Biosynthesis Initiation II	0.95	0.5	0/2 (0%)	1/2 (50%)	0/2 (0%)	1/2 (50%)	FASN
HIF1α Signaling	0.949	0.0893	0/112 (0%)	10/112 (9%)	0/112 (0%)	102/112 (91%)	TP53,PIK3C2B,JUN,MAPK14,IRS1,FGFR1,IRS2,MAPK7,MMP17,ARNT
IL-9 Signaling	0.936	0.111	0/45 (0%)	5/45 (11%)	0/45 (0%)	40/45 (89%)	PIK3C2B,IRS1,FGFR1,CISH,IRS2
TGF-β Signaling	0.932	0.0941	0/85 (0%)	8/85 (9%)	0/85 (0%)	77/85 (91%)	FOS,JUN,MAPK14,TGFB1,SKI,TGFB2,MAP2K3,INHBA
RANK Signaling in Osteoclasts	0.929	0.0909	0/99 (0%)	9/99 (9%)	0/99 (0%)	90/99 (91%)	PIK3C2B,FOS,JUN,MAPK14,PTK2B,IRS1,FGFR1,NFATC2,IRS2
Ephrin Receptor Signaling	0.926	0.0819	0/171 (0%)	14/171 (8%)	0/171 (0%)	157/171 (92%)	GNB1,ACTR2,GRIN1,GRIN2A,ITSN1,ANGPT1,KALRN,CRKL,GRIN2D,GNAO1,ABL1,BCAR1,GNG7,PDGFB
Inhibition of Angiogenesis by TSP1	0.92	0.121	0/33 (0%)	4/33 (12%)	0/33 (0%)	29/33 (88%)	TP53,JUN,MAPK14,TGFB1
HER-2 Signaling in Breast Cancer	0.911	0.093	0/86 (0%)	8/86 (9%)	0/86 (0%)	78/86 (91%)	TP53,PIK3C2B,CCNE2,FOXO1,IRS1,FGFR1,PRKCE,IRS2
VEGF Family Ligand-Receptor Interactions	0.911	0.093	0/86 (0%)	8/86 (9%)	0/86 (0%)	78/86 (91%)	PLA2G4A,PIK3C2B,FOS,PLA2G2D,IRS1,FGFR1,PRKCE,IRS2
VEGF Signaling	0.91	0.09	0/100 (0%)	9/100 (9%)	0/100 (0%)	91/100 (91%)	PIK3C2B,FOXO1,YWHAE,PTK2B,IRS1,ACTN2,FGFR1,IRS2,ARNT
GM-CSF Signaling	0.895	0.0959	0/73 (0%)	7/73 (10%)	0/73 (0%)	66/73 (90%)	PIK3C2B,CAMK2A,IRS1,FGFR1,CISH,IRS2,CAMK2B
Fc Epsilon RI Signaling	0.894	0.087	0/115 (0%)	10/115 (9%)	0/115 (0%)	105/115 (91%)	PLA2G4A,PIK3C2B,MAPK14,INPP5J,PLA2G2D,IRS1,FGFR1,PRKCE,IRS2,MAP2K3
UDP-N-acetyl-D-galactosamine Biosynthesis II	0.887	0.182	0/11 (0%)	2/11 (18%)	0/11 (0%)	9/11 (82%)	HK1,HK2
IL-17A Signaling in Gastric Cells	0.884	0.136	0/22 (0%)	3/22 (14%)	0/22 (0%)	19/22 (86%)	FOS,JUN,MAPK14
Pancreatic Adenocarcinoma Signaling	0.877	0.0862	0/116 (0%)	10/116 (9%)	0/116 (0%)	106/116 (91%)	TP53,PIK3C2B,E2F4,TGFB1,IRS1,FGFR1,TGFA,ABL1,TGFB2,IRS2
Factors Promoting Cardiogenesis in Vertebrates	0.87	0.0909	0/88 (0%)	8/88 (9%)	0/88 (0%)	80/88 (91%)	CCNE2,LRP5,MAPK14,TGFB1,BMP3,TGFB2,PRKCE,LRP1
Role of NFAT in Regulation of the Immune Response	0.869	0.08	0/175 (0%)	14/175 (8%)	0/175 (0%)	161/175 (92%)	PIK3C2B,HLA-A,FGFR1,GNG7,CABIN1,GNB1,FOS,JUN,MEF2D,IRS1,GNAO1,NFATC2,HLA-DOB,IRS2
G-Protein Coupled Receptor Signaling	0.852	0.0749	0/267 (0%)	20/267 (7%)	0/267 (0%)	247/267 (93%)	PIK3C2B,GRM2,PTK2B,PTGER3,FGFR1,ADCY6,PRKAR2A,PDE4A,CHRM1,ADRA1D,SYNGAP1,CAMK2A,IRS1,GNAO1,PRKCE,IRS2,DUSP4,ADORA1,PDE11A,CAMK2B
Neuroprotective Role of THOP1 in Alzheimer's Disease	0.851	0.114	0/35 (0%)	4/35 (11%)	0/35 (0%)	31/35 (89%)	YWHAE,HLA-A,PRKAR2A,APP
Neurotrophin/TRK Signaling	0.851	0.0933	0/75 (0%)	7/75 (9%)	0/75 (0%)	68/75 (91%)	PIK3C2B,FOS,JUN,IRS1,FGFR1,IRS2,MAP2K3
CNTF Signaling	0.834	0.0968	0/62 (0%)	6/62 (10%)	0/62 (0%)	56/62 (90%)	PIK3C2B,MTOR,IRS1,FGFR1,CNTFR,IRS2
ERK5 Signaling	0.834	0.0968	0/62 (0%)	6/62 (10%)	0/62 (0%)	56/62 (90%)	FOS,YWHAG,YWHAE,MEF2D,MAPK7,ELK4
Angiopoietin Signaling	0.829	0.0921	0/76 (0%)	7/76 (9%)	0/76 (0%)	69/76 (91%)	PIK3C2B,TNIP1,ANGPT1,FOXO1,IRS1,FGFR1,IRS2
Role of Tissue Factor in Cancer	0.826	0.084	0/119 (0%)	10/119 (8%)	0/119 (0%)	109/119 (92%)	TP53,PIK3C2B,MTOR,MAPK14,CTGF,PTK2B,IRS1,FGFR1,EGR1,IRS2
Assembly of RNA Polymerase III Complex	0.824	0.167	0/12 (0%)	2/12 (17%)	0/12 (0%)	10/12 (83%)	GTF3C2,SF3A1
Regulation of eIF4 and p70S6K Signaling	0.816	0.0805	0/149 (0%)	12/149 (8%)	0/149 (0%)	137/149 (92%)	PIK3C2B,MTOR,RPS4Y1,MAPK14,RPS16,IRS1,FGFR1,RPS18,EIF4G3,IRS2,AGO1,EIF4G1
Ceramide Signaling	0.811	0.0879	0/91 (0%)	8/91 (9%)	0/91 (0%)	83/91 (91%)	PIK3C2B,FOS,JUN,IRS1,FGFR1,IRS2,SMPD3,KSR1
Role of IL-17A in Arthritis	0.81	0.0952	0/63 (0%)	6/63 (10%)	0/63 (0%)	57/63 (90%)	PIK3C2B,MAPK14,IRS1,FGFR1,IRS2,MAP2K3
Non-Small Cell Lung Cancer Signaling	0.808	0.0909	0/77 (0%)	7/77 (9%)	0/77 (0%)	70/77 (91%)	TP53,PIK3C2B,IRS1,FGFR1,TGFA,ABL1,IRS2
Cdc42 Signaling	0.804	0.0815	0/135 (0%)	11/135 (8%)	0/135 (0%)	124/135 (92%)	ACTR2,FOS,DIAPH1,JUN,MAPK14,APC2,HLA-A,BAIAP2,HLA-DOB,FGD1,TNK2
Gap Junction Signaling	0.801	0.0788	0/165 (0%)	13/165 (8%)	0/165 (0%)	152/165 (92%)	DBN1,PIK3C2B,FGFR1,PRKAR2A,ADCY6,PRKG2,PLCH2,IRS1,CAV1,PRKCE,IRS2,TUBB4A,MAPK7
CDP-diacylglycerol Biosynthesis I	0.801	0.125	0/24 (0%)	3/24 (13%)	0/24 (0%)	21/24 (88%)	LPCAT4,AGPAT1,AGPAT3
Amyloid Processing	0.795	0.1	0/50 (0%)	5/50 (10%)	0/50 (0%)	45/50 (90%)	CAPN5,MAPK14,PRKAR2A,PRKCE,APP
Role of BRCA1 in DNA Damage Response	0.788	0.0897	0/78 (0%)	7/78 (9%)	0/78 (0%)	71/78 (91%)	TP53,E2F4,ARID1A,DPF1,MDC1,SMARCC2,SMARCA4
Endometrial Cancer Signaling	0.788	0.0938	0/64 (0%)	6/64 (9%)	0/64 (0%)	58/64 (91%)	TP53,PIK3C2B,APC2,IRS1,FGFR1,IRS2
1,25-dihydroxyvitamin D3 Biosynthesis	0.787	0.333	0/3 (0%)	1/3 (33%)	0/3 (0%)	2/3 (67%)	POR
Lactose Degradation III	0.787	0.333	0/3 (0%)	1/3 (33%)	0/3 (0%)	2/3 (67%)	LCT
Semaphorin Signaling in Neurons	0.77	0.098	0/51 (0%)	5/51 (10%)	0/51 (0%)	46/51 (90%)	SEMA3A,CRMP1,PLXNA1,SEMA4D,FNBP1
Erythropoietin Signaling	0.768	0.0886	0/79 (0%)	7/79 (9%)	0/79 (0%)	72/79 (91%)	PIK3C2B,FOS,JUN,IRS1,FGFR1,PRKCE,IRS2
IL-17 Signaling	0.768	0.0886	0/79 (0%)	7/79 (9%)	0/79 (0%)	72/79 (91%)	PIK3C2B,JUN,MAPK14,IRS1,FGFR1,IRS2,MAP2K3
CCR3 Signaling in Eosinophils	0.762	0.0813	0/123 (0%)	10/123 (8%)	0/123 (0%)	113/123 (92%)	GNB1,PLA2G4A,PIK3C2B,MAPK14,PLA2G2D,IRS1,FGFR1,PRKCE,IRS2,GNG7
CD28 Signaling in T Helper Cells	0.762	0.0813	0/123 (0%)	10/123 (8%)	0/123 (0%)	113/123 (92%)	PIK3C2B,ACTR2,FOS,JUN,HLA-A,IRS1,FGFR1,HLA-DOB,NFATC2,IRS2
Insulin Receptor Signaling	0.76	0.0797	0/138 (0%)	11/138 (8%)	0/138 (0%)	127/138 (92%)	PIK3C2B,MTOR,ASIC2,PPP1R10,INPP5J,FOXO1,IRS1,CRKL,FGFR1,PRKAR2A,IRS2
Glucocorticoid Receptor Signaling	0.758	0.0725	0/276 (0%)	20/276 (7%)	0/276 (0%)	256/276 (93%)	PIK3C2B,ARID1A,DPF1,FGFR1,HSPA1A/HSPA1B,SMARCA4,FOS,JUN,MAPK14,TAF4,TGFB1,IRS1,ANXA1,TGFB2,NFATC2,IRS2,TAF3,SMARCC2,NCOR2,TAF15
Melanocyte Development and Pigmentation Signaling	0.757	0.0851	0/94 (0%)	8/94 (9%)	0/94 (0%)	86/94 (91%)	KITLG,PIK3C2B,IRS1,FGFR1,PRKAR2A,ADCY6,KIT,IRS2
ATM Signaling	0.749	0.0875	0/80 (0%)	7/80 (9%)	0/80 (0%)	73/80 (91%)	TP53,JUN,MAPK14,TP73,TRRAP,ABL1,MDC1
Macropinocytosis Signaling	0.749	0.0875	0/80 (0%)	7/80 (9%)	0/80 (0%)	73/80 (91%)	PIK3C2B,IRS1,FGFR1,HGF,PRKCE,IRS2,PDGFB
Chemokine Signaling	0.745	0.0909	0/66 (0%)	6/66 (9%)	0/66 (0%)	60/66 (91%)	FOS,JUN,MAPK14,CAMK2A,PTK2B,CAMK2B
Type II Diabetes Mellitus Signaling	0.732	0.08	0/125 (0%)	10/125 (8%)	0/125 (0%)	115/125 (92%)	PIK3C2B,MTOR,IRS1,FGFR1,ABCC8,PRKCE,IRS2,MAFA,SMPD3,KCNJ11
Role of PKR in Interferon Induction and Antiviral Response	0.731	0.103	0/39 (0%)	4/39 (10%)	0/39 (0%)	35/39 (90%)	TP53,TRAF3,MAPK14,MAP2K3
Phosphatidylglycerol Biosynthesis II (Non-plastidic)	0.728	0.115	0/26 (0%)	3/26 (12%)	0/26 (0%)	23/26 (88%)	LPCAT4,AGPAT1,AGPAT3
p38 MAPK Signaling	0.719	0.0811	0/111 (0%)	9/111 (8%)	0/111 (0%)	102/111 (92%)	TP53,PLA2G4A,MAPK14,IL1RAPL2,PLA2G2D,TGFB1,MEF2D,TGFB2,MAP2K3
ILK Signaling	0.715	0.0749	0/187 (0%)	14/187 (7%)	0/187 (0%)	173/187 (93%)	MYH10,PIK3C2B,MYH9,ACTN2,FGFR1,MYH14,FOS,MTOR,JUN,IRS1,IRS2,DSP,FNBP1,TESK1
Prolactin Signaling	0.712	0.0854	0/82 (0%)	7/82 (9%)	0/82 (0%)	75/82 (91%)	PIK3C2B,FOS,JUN,IRS1,FGFR1,PRKCE,IRS2
Gαq Signaling	0.707	0.0764	0/157 (0%)	12/157 (8%)	0/157 (0%)	145/157 (92%)	GNB1,PIK3C2B,PTK2B,IRS1,FGFR1,PRKCE,NFATC2,IRS2,CHRM1,FNBP1,GNG7,ADRA1D
ErbB2-ErbB3 Signaling	0.704	0.0882	0/68 (0%)	6/68 (9%)	0/68 (0%)	62/68 (91%)	PIK3C2B,JUN,FOXO1,IRS1,FGFR1,IRS2
HGF Signaling	0.703	0.0804	0/112 (0%)	9/112 (8%)	0/112 (0%)	103/112 (92%)	PIK3C2B,FOS,JUN,IRS1,CRKL,FGFR1,HGF,PRKCE,IRS2
3-phosphoinositide Biosynthesis	0.703	0.0745	0/188 (0%)	14/188 (7%)	0/188 (0%)	174/188 (93%)	WBP11,PIK3C2B,DUSP5,DUSP8,PHOSPHO1,PPP1R13B,IRS1,FGFR1,DOT1L,KIT,PIP4K2B,IRS2,PTPRN,PI4KA
PEDF Signaling	0.694	0.0843	0/83 (0%)	7/83 (8%)	0/83 (0%)	76/83 (92%)	TP53,PIK3C2B,MAPK14,IRS1,FGFR1,IRS2,PNPLA2
D-myo-inositol (1,4,5)-Trisphosphate Biosynthesis	0.694	0.111	0/27 (0%)	3/27 (11%)	0/27 (0%)	24/27 (89%)	PIP4K2B,PLCH2,PI4KA
Glioma Invasiveness Signaling	0.684	0.087	0/69 (0%)	6/69 (9%)	0/69 (0%)	63/69 (91%)	PIK3C2B,IRS1,FGFR1,CD44,IRS2,FNBP1
Melanoma Signaling	0.678	0.0909	0/55 (0%)	5/55 (9%)	0/55 (0%)	50/55 (91%)	TP53,PIK3C2B,IRS1,FGFR1,IRS2
Regulation of Actin-based Motility by Rho	0.677	0.0833	0/84 (0%)	7/84 (8%)	0/84 (0%)	77/84 (92%)	ACTR2,BAIAP2,PIP4K2B,WASF1,ARHGDIA,FNBP1,PI4KA
2-ketoglutarate Dehydrogenase Complex	0.674	0.25	0/4 (0%)	1/4 (25%)	0/4 (0%)	3/4 (75%)	OGDH
Heme Biosynthesis from Uroporphyrinogen-III I	0.674	0.25	0/4 (0%)	1/4 (25%)	0/4 (0%)	3/4 (75%)	CPOX
Superpathway of Inositol Phosphate Compounds	0.671	0.0721	0/222 (0%)	16/222 (7%)	0/222 (0%)	206/222 (93%)	WBP11,PIK3C2B,DUSP8,FGFR1,DOT1L,PIP4K2B,PLCH2,DUSP5,PHOSPHO1,INPP5J,IRS1,PPP1R13B,KIT,IRS2,PTPRN,PI4KA
iCOS-iCOSL Signaling in T Helper Cells	0.659	0.0783	0/115 (0%)	9/115 (8%)	0/115 (0%)	106/115 (92%)	PIK3C2B,CAMK2A,HLA-A,IRS1,FGFR1,HLA-DOB,NFATC2,IRS2,CAMK2B
Aldosterone Signaling in Epithelial Cells	0.646	0.0741	0/162 (0%)	12/162 (7%)	0/162 (0%)	150/162 (93%)	PIK3C2B,ASIC2,IRS1,FGFR1,HSPA1A/HSPA1B,PRKCE,PIP4K2B,IRS2,PLCH2,SLC9A1,DNAJB5,PI4KA
Sperm Motility	0.631	0.0769	0/117 (0%)	9/117 (8%)	0/117 (0%)	108/117 (92%)	PLA2G4A,PLA2G2D,PTK2B,CACNA1H,PDE4A,PRKAR2A,PRKCE,PRKG2,PLCH2
Triacylglycerol Biosynthesis	0.629	0.093	0/43 (0%)	4/43 (9%)	0/43 (0%)	39/43 (91%)	LPCAT4,PLPPR2,AGPAT1,AGPAT3
Chondroitin Sulfate Degradation (Metazoa)	0.629	0.125	0/16 (0%)	2/16 (13%)	0/16 (0%)	14/16 (88%)	CD44,ARSB
fMLP Signaling in Neutrophils	0.617	0.0763	0/118 (0%)	9/118 (8%)	0/118 (0%)	109/118 (92%)	GNB1,PIK3C2B,ACTR2,IRS1,FGFR1,PRKCE,NFATC2,IRS2,GNG7
Th2 Pathway	0.597	0.0741	0/135 (0%)	10/135 (7%)	0/135 (0%)	125/135 (93%)	PIK3C2B,JUN,HLA-A,TGFB1,CHD4,IRS1,FGFR1,HLA-DOB,NFATC2,IRS2
Ephrin A Signaling	0.597	0.0847	0/59 (0%)	5/59 (8%)	0/59 (0%)	54/59 (92%)	PIK3C2B,IRS1,FGFR1,IRS2,BCAR1
Xenobiotic Metabolism Signaling	0.593	0.0687	0/262 (0%)	18/262 (7%)	0/262 (0%)	244/262 (93%)	PIK3C2B,FGFR1,CHST12,ARNT,CAMK2A,MAPK14,IRS1,GSTM4,PRKCE,MAP2K3,HS6ST3,IRS2,NCOR2,MAPK7,NDST1,CITED2,MGST3,CAMK2B
NAD Biosynthesis from 2-amino-3-carboxymuconate Semialdehyde	0.59	0.2	0/5 (0%)	1/5 (20%)	0/5 (0%)	4/5 (80%)	ABL1
Tetrapyrrole Biosynthesis II	0.59	0.2	0/5 (0%)	1/5 (20%)	0/5 (0%)	4/5 (80%)	ALAS2
Role of Oct4 in Mammalian Embryonic Stem Cell Pluripotency	0.584	0.0889	0/45 (0%)	4/45 (9%)	0/45 (0%)	41/45 (91%)	TP53,SPP1,RARA,PHC1
Antiproliferative Role of Somatostatin Receptor 2	0.578	0.08	0/75 (0%)	6/75 (8%)	0/75 (0%)	69/75 (92%)	GNB1,PIK3C2B,IRS1,FGFR1,IRS2,GNG7
Cyclins and Cell Cycle Regulation	0.578	0.08	0/75 (0%)	6/75 (8%)	0/75 (0%)	69/75 (92%)	TP53,CCNE2,E2F4,TGFB1,ABL1,TGFB2
GDNF Family Ligand-Receptor Interactions	0.578	0.08	0/75 (0%)	6/75 (8%)	0/75 (0%)	69/75 (92%)	PIK3C2B,FOS,JUN,IRS1,FGFR1,IRS2
Clathrin-mediated Endocytosis Signaling	0.566	0.0703	0/185 (0%)	13/185 (7%)	0/185 (0%)	172/185 (93%)	ACTR2,PIK3C2B,STON2,FGFR1,PDGFB,DNM1,LYZ,FGF18,IRS1,AAK1,IRS2,HGS,SNAP91
PPAR Signaling	0.566	0.0769	0/91 (0%)	7/91 (8%)	0/91 (0%)	84/91 (92%)	FOS,JUN,IL1RAPL2,PPARD,NCOR2,PDGFB,CITED2
Triacylglycerol Degradation	0.563	0.087	0/46 (0%)	4/46 (9%)	0/46 (0%)	42/46 (91%)	FAAH,DAGLA,PNPLA2,NDST1
Estrogen-Dependent Breast Cancer Signaling	0.562	0.0789	0/76 (0%)	6/76 (8%)	0/76 (0%)	70/76 (92%)	PIK3C2B,FOS,JUN,IRS1,FGFR1,IRS2
G Protein Signaling Mediated by Tubby	0.552	0.0938	0/32 (0%)	3/32 (9%)	0/32 (0%)	29/32 (91%)	GNB1,ABL1,GNG7
IL-17A Signaling in Fibroblasts	0.552	0.0938	0/32 (0%)	3/32 (9%)	0/32 (0%)	29/32 (91%)	FOS,JUN,MAPK14
Role of JAK2 in Hormone-like Cytokine Signaling	0.552	0.0938	0/32 (0%)	3/32 (9%)	0/32 (0%)	29/32 (91%)	IRS1,IRS2,SH2B1
Sumoylation Pathway	0.552	0.0761	0/92 (0%)	7/92 (8%)	0/92 (0%)	85/92 (92%)	TP53,FOS,JUN,MYB,ARHGDIA,PML,FNBP1
IL-6 Signaling	0.541	0.0726	0/124 (0%)	9/124 (7%)	0/124 (0%)	115/124 (93%)	PIK3C2B,FOS,JUN,MAPK14,IL1RAPL2,IRS1,FGFR1,IRS2,MAP2K3
Leukocyte Extravasation Signaling	0.537	0.0686	0/204 (0%)	14/204 (7%)	0/204 (0%)	190/204 (93%)	PIK3C2B,MAPK14,PTK2B,IRS1,FGFR1,ACTN2,CRKL,CD44,ABL1,PRKCE,IRS2,BCAR1,MMP17,MSN
Regulation of IL-2 Expression in Activated and Anergic T Lymphocytes	0.531	0.0769	0/78 (0%)	6/78 (8%)	0/78 (0%)	72/78 (92%)	FOS,JUN,TGFB1,TGFB2,TOB1,NFATC2
Human Embryonic Stem Cell Pluripotency	0.528	0.0709	0/141 (0%)	10/141 (7%)	0/141 (0%)	131/141 (93%)	PIK3C2B,FOXO1,TGFB1,IRS1,FGFR1,BMP3,TGFB2,IRS2,PDGFB,INHBA
Glioblastoma Multiforme Signaling	0.527	0.0701	0/157 (0%)	11/157 (7%)	0/157 (0%)	146/157 (93%)	TP53,PIK3C2B,MTOR,E2F4,FOXO1,IRS1,FGFR1,IRS2,PLCH2,PDGFB,FNBP1
GABA Receptor Signaling	0.526	0.0794	0/63 (0%)	5/63 (8%)	0/63 (0%)	58/63 (92%)	DNM1,SLC32A1,KCNQ2,GABRG1,ADCY6
GADD45 Signaling	0.522	0.105	0/19 (0%)	2/19 (11%)	0/19 (0%)	17/19 (89%)	TP53,CCNE2
Glutathione Redox Reactions I	0.522	0.105	0/19 (0%)	2/19 (11%)	0/19 (0%)	17/19 (89%)	GPX4,MGST3
DNA damage-induced 14-3-3σ Signaling	0.522	0.105	0/19 (0%)	2/19 (11%)	0/19 (0%)	17/19 (89%)	TP53,CCNE2
Paxillin Signaling	0.52	0.0727	0/110 (0%)	8/110 (7%)	0/110 (0%)	102/110 (93%)	PIK3C2B,MAPK14,PTK2B,IRS1,ACTN2,FGFR1,IRS2,BCAR1
IL-8 Signaling	0.518	0.0684	0/190 (0%)	13/190 (7%)	0/190 (0%)	177/190 (93%)	PIK3C2B,PTK2B,ANGPT1,FGFR1,GNG7,GNB1,FOS,MTOR,JUN,IRS1,PRKCE,IRS2,FNBP1
PI3K Signaling in B Lymphocytes	0.518	0.0714	0/126 (0%)	9/126 (7%)	0/126 (0%)	117/126 (93%)	FOS,JUN,CAMK2A,IRS1,ABL1,NFATC2,IRS2,PLCH2,CAMK2B
Growth Hormone Signaling	0.516	0.0759	0/79 (0%)	6/79 (8%)	0/79 (0%)	73/79 (92%)	PIK3C2B,FOS,IRS1,FGFR1,PRKCE,IRS2
Role of PI3K/AKT Signaling in the Pathogenesis of Influenza	0.509	0.0781	0/64 (0%)	5/64 (8%)	0/64 (0%)	59/64 (92%)	PIK3C2B,IRS1,CRKL,FGFR1,IRS2
Eicosanoid Signaling	0.509	0.0781	0/64 (0%)	5/64 (8%)	0/64 (0%)	59/64 (92%)	PLA2G4A,PTGFR,PLA2G2D,PTGER3,PTGDS
Cell Cycle: G2/M DNA Damage Checkpoint Regulation	0.505	0.0816	0/49 (0%)	4/49 (8%)	0/49 (0%)	45/49 (92%)	TP53,YWHAG,YWHAE,ABL1
Cancer Drug Resistance By Drug Efflux	0.505	0.0816	0/49 (0%)	4/49 (8%)	0/49 (0%)	45/49 (92%)	TP53,FOXO6,FOXO1,FOXG1
IL-10 Signaling	0.493	0.0769	0/65 (0%)	5/65 (8%)	0/65 (0%)	60/65 (92%)	FOS,JUN,MAPK14,IL1RAPL2,MAP2K3
PAK Signaling	0.485	0.0722	0/97 (0%)	7/97 (7%)	0/97 (0%)	90/97 (93%)	PIK3C2B,PTK2B,IRS1,FGFR1,IRS2,GIT1,PDGFB
p70S6K Signaling	0.484	0.0698	0/129 (0%)	9/129 (7%)	0/129 (0%)	120/129 (93%)	PIK3C2B,MTOR,YWHAG,YWHAE,IRS1,FGFR1,PRKCE,IRS2,PLCH2
Lymphotoxin β Receptor Signaling	0.478	0.0758	0/66 (0%)	5/66 (8%)	0/66 (0%)	61/66 (92%)	PIK3C2B,TRAF3,IRS1,FGFR1,IRS2
FAK Signaling	0.473	0.0714	0/98 (0%)	7/98 (7%)	0/98 (0%)	91/98 (93%)	CAPN5,PIK3C2B,IRS1,FGFR1,IRS2,TNS1,BCAR1
Chondroitin Sulfate Biosynthesis	0.469	0.0784	0/51 (0%)	4/51 (8%)	0/51 (0%)	47/51 (92%)	B3GAT1,HS6ST3,CHST12,NDST1
Maturity Onset Diabetes of Young (MODY) Signaling	0.464	0.0952	0/21 (0%)	2/21 (10%)	0/21 (0%)	19/21 (90%)	CACNA1C,CACNA1A
NGF Signaling	0.462	0.0696	0/115 (0%)	8/115 (7%)	0/115 (0%)	107/115 (93%)	TP53,PIK3C2B,IRS1,FGFR1,TRIO,IRS2,MAPK7,SMPD3
Tec Kinase Signaling	0.459	0.0671	0/164 (0%)	11/164 (7%)	0/164 (0%)	153/164 (93%)	GNB1,PIK3C2B,FOS,PTK2B,IRS1,FGFR1,GNAO1,PRKCE,IRS2,FNBP1,GNG7
Actin Nucleation by ARP-WASP Complex	0.452	0.0769	0/52 (0%)	4/52 (8%)	0/52 (0%)	48/52 (92%)	ACTR2,BAIAP2,WASF1,FNBP1
α-Adrenergic Signaling	0.448	0.0714	0/84 (0%)	6/84 (7%)	0/84 (0%)	78/84 (93%)	GNB1,PRKAR2A,ADCY6,PRKCE,SLC8A2,GNG7
eNOS Signaling	0.437	0.0667	0/150 (0%)	10/150 (7%)	0/150 (0%)	140/150 (93%)	PIK3C2B,IRS1,FGFR1,HSPA1A/HSPA1B,CAV1,PRKAR2A,ADCY6,PRKCE,SLC7A1,IRS2
FcγRIIB Signaling in B Lymphocytes	0.436	0.0755	0/53 (0%)	4/53 (8%)	0/53 (0%)	49/53 (92%)	PIK3C2B,IRS1,FGFR1,IRS2
Dermatan Sulfate Biosynthesis	0.436	0.0755	0/53 (0%)	4/53 (8%)	0/53 (0%)	49/53 (92%)	B3GAT1,HS6ST3,CHST12,NDST1
Unfolded protein response	0.436	0.0755	0/53 (0%)	4/53 (8%)	0/53 (0%)	49/53 (92%)	SYVN1,SCAP,INSIG1,HSPA1A/HSPA1B
FLT3 Signaling in Hematopoietic Progenitor Cells	0.436	0.0706	0/85 (0%)	6/85 (7%)	0/85 (0%)	79/85 (93%)	PIK3C2B,MTOR,MAPK14,IRS1,FGFR1,IRS2
Gαi Signaling	0.43	0.0678	0/118 (0%)	8/118 (7%)	0/118 (0%)	110/118 (93%)	GNB1,GRM2,PTGER3,CAV1,PRKAR2A,ADCY6,ADORA1,GNG7
G Beta Gamma Signaling	0.423	0.0698	0/86 (0%)	6/86 (7%)	0/86 (0%)	80/86 (93%)	GNB1,GNAO1,CAV1,PRKAR2A,PRKCE,GNG7
Glycoaminoglycan-protein Linkage Region Biosynthesis	0.422	0.125	0/8 (0%)	1/8 (13%)	0/8 (0%)	7/8 (88%)	B3GAT1
Sphingomyelin Metabolism	0.422	0.125	0/8 (0%)	1/8 (13%)	0/8 (0%)	7/8 (88%)	SMPD3
Basal Cell Carcinoma Signaling	0.421	0.0714	0/70 (0%)	5/70 (7%)	0/70 (0%)	65/70 (93%)	TP53,GLI2,APC2,SUFU,BMP3
Role of JAK1 and JAK3 in γc Cytokine Signaling	0.421	0.0714	0/70 (0%)	5/70 (7%)	0/70 (0%)	65/70 (93%)	PIK3C2B,PTK2B,IRS1,FGFR1,IRS2
ErbB4 Signaling	0.408	0.0704	0/71 (0%)	5/71 (7%)	0/71 (0%)	66/71 (93%)	PIK3C2B,IRS1,FGFR1,PRKCE,IRS2
Dermatan Sulfate Biosynthesis (Late Stages)	0.406	0.0769	0/39 (0%)	3/39 (8%)	0/39 (0%)	36/39 (92%)	HS6ST3,CHST12,NDST1
Regulation of the Epithelial-Mesenchymal Transition Pathway	0.396	0.0638	0/188 (0%)	12/188 (6%)	0/188 (0%)	176/188 (94%)	MAML1,PIK3C2B,FGF18,TGFB1,IRS1,FGFR1,EGR1,HGF,TGFB2,IRS2,MAP2K3,BCL9
Ephrin B Signaling	0.395	0.0694	0/72 (0%)	5/72 (7%)	0/72 (0%)	67/72 (93%)	GNB1,KALRN,ITSN1,GNAO1,GNG7
Estrogen-mediated S-phase Entry	0.39	0.0833	0/24 (0%)	2/24 (8%)	0/24 (0%)	22/24 (92%)	CCNE2,E2F4
Glutathione-mediated Detoxification	0.39	0.0833	0/24 (0%)	2/24 (8%)	0/24 (0%)	22/24 (92%)	GSTM4,MGST3
Sertoli Cell-Sertoli Cell Junction Signaling	0.39	0.064	0/172 (0%)	11/172 (6%)	0/172 (0%)	161/172 (94%)	JUN,MAPK14,MYO7A,ACTN2,SPTB,PRKAR2A,TUBB4A,MAP2K3,NECTIN1,PRKG2,BCAR1
Hereditary Breast Cancer Signaling	0.387	0.0647	0/139 (0%)	9/139 (6%)	0/139 (0%)	130/139 (94%)	TP53,PIK3C2B,ARID1A,DPF1,IRS1,FGFR1,IRS2,SMARCC2,SMARCA4
IL-17A Signaling in Airway Cells	0.383	0.0685	0/73 (0%)	5/73 (7%)	0/73 (0%)	68/73 (93%)	PIK3C2B,MAPK14,IRS1,FGFR1,IRS2
Prostanoid Biosynthesis	0.383	0.111	0/9 (0%)	1/9 (11%)	0/9 (0%)	8/9 (89%)	PTGDS
mTOR Signaling	0.381	0.0632	0/190 (0%)	12/190 (6%)	0/190 (0%)	178/190 (94%)	PIK3C2B,MTOR,RPS4Y1,RPS16,IRS1,FGFR1,RPS18,PRKCE,EIF4G3,IRS2,EIF4G1,FNBP1
MSP-RON Signaling Pathway	0.378	0.0702	0/57 (0%)	4/57 (7%)	0/57 (0%)	53/57 (93%)	PIK3C2B,IRS1,FGFR1,IRS2
Pyrimidine Ribonucleotides Interconversion	0.372	0.0732	0/41 (0%)	3/41 (7%)	0/41 (0%)	38/41 (93%)	AK5,ANXA1,ENTPD7
Synaptic Long Term Depression	0.369	0.0638	0/141 (0%)	9/141 (6%)	0/141 (0%)	132/141 (94%)	PLA2G4A,GRM2,PLA2G2D,GRIA1,GNAO1,PRKCE,RYR1,PRKG2,PLCH2
T Cell Receptor Signaling	0.364	0.0648	0/108 (0%)	7/108 (6%)	0/108 (0%)	101/108 (94%)	PIK3C2B,FOS,JUN,IRS1,FGFR1,NFATC2,IRS2
Ovarian Cancer Signaling	0.361	0.0634	0/142 (0%)	9/142 (6%)	0/142 (0%)	133/142 (94%)	TP53,PIK3C2B,MTOR,IRS1,FGFR1,CD44,PRKAR2A,ABL1,IRS2
IL-15 Signaling	0.36	0.0667	0/75 (0%)	5/75 (7%)	0/75 (0%)	70/75 (93%)	PIK3C2B,MAPK14,IRS1,FGFR1,IRS2
Hepatic Fibrosis / Hepatic Stellate Cell Activation	0.359	0.0625	0/176 (0%)	11/176 (6%)	0/176 (0%)	165/176 (94%)	MYH10,CTGF,MYH9,IL1RAPL2,TGFB1,FGFR1,MYH14,HGF,TGFA,TGFB2,PDGFB
Chondroitin Sulfate Biosynthesis (Late Stages)	0.357	0.0714	0/42 (0%)	3/42 (7%)	0/42 (0%)	39/42 (93%)	HS6ST3,CHST12,NDST1
autophagy	0.351	0.0678	0/59 (0%)	4/59 (7%)	0/59 (0%)	55/59 (93%)	MTOR,CTSK,ATG9A,WDFY3
Gustation Pathway	0.346	0.0636	0/110 (0%)	7/110 (6%)	0/110 (0%)	103/110 (94%)	GNB1,ASIC2,PDE4A,PRKAR2A,ADCY6,PDE11A,GNG7
Gα12/13 Signaling	0.345	0.063	0/127 (0%)	8/127 (6%)	0/127 (0%)	119/127 (94%)	PIK3C2B,JUN,PTK2B,IRS1,FGFR1,MEF2D,IRS2,MAPK7
iNOS Signaling	0.342	0.0698	0/43 (0%)	3/43 (7%)	0/43 (0%)	40/43 (93%)	FOS,JUN,MAPK14
Pyrimidine Ribonucleotides De Novo Biosynthesis	0.342	0.0698	0/43 (0%)	3/43 (7%)	0/43 (0%)	40/43 (93%)	AK5,ANXA1,ENTPD7
Role of Pattern Recognition Receptors in Recognition of Bacteria and Viruses	0.337	0.0625	0/128 (0%)	8/128 (6%)	0/128 (0%)	120/128 (94%)	PIK3C2B,TGFB1,IRS1,FGFR1,CASP1,TGFB2,PRKCE,IRS2
B Cell Development	0.331	0.0741	0/27 (0%)	2/27 (7%)	0/27 (0%)	25/27 (93%)	HLA-A,HLA-DOB
cAMP-mediated signaling	0.326	0.0605	0/215 (0%)	13/215 (6%)	0/215 (0%)	202/215 (94%)	AKAP2,GRM2,CAMK2A,PTGER3,GNAO1,PDE4A,PRKAR2A,ADCY6,DUSP4,PDE11A,ADORA1,CHRM1,CAMK2B
Adipogenesis pathway	0.32	0.0615	0/130 (0%)	8/130 (6%)	0/130 (0%)	122/130 (94%)	TP53,EGR2,FOXO1,TGFB1,FGFR1,SAP130,PER2,KMT2B
Phagosome Formation	0.319	0.0619	0/113 (0%)	7/113 (6%)	0/113 (0%)	106/113 (94%)	PIK3C2B,IRS1,FGFR1,PRKCE,IRS2,PLCH2,FNBP1
Hematopoiesis from Multipotent Stem Cells	0.319	0.0909	0/11 (0%)	1/11 (9%)	0/11 (0%)	10/11 (91%)	KITLG
Production of Nitric Oxide and Reactive Oxygen Species in Macrophages	0.317	0.0604	0/182 (0%)	11/182 (6%)	0/182 (0%)	171/182 (94%)	PIK3C2B,FOS,LYZ,JUN,MAPK14,PPP1R10,IRS1,FGFR1,PRKCE,IRS2,FNBP1
Antigen Presentation Pathway	0.313	0.0714	0/28 (0%)	2/28 (7%)	0/28 (0%)	26/28 (93%)	HLA-A,HLA-DOB
TNFR2 Signaling	0.297	0.069	0/29 (0%)	2/29 (7%)	0/29 (0%)	27/29 (93%)	FOS,JUN
Th1 and Th2 Activation Pathway	0.295	0.0595	0/168 (0%)	10/168 (6%)	0/168 (0%)	158/168 (94%)	PIK3C2B,JUN,HLA-A,TGFB1,CHD4,IRS1,FGFR1,HLA-DOB,NFATC2,IRS2
OX40 Signaling Pathway	0.293	0.0625	0/64 (0%)	4/64 (6%)	0/64 (0%)	60/64 (94%)	TRAF3,JUN,HLA-A,HLA-DOB
Hepatic Cholestasis	0.293	0.0596	0/151 (0%)	9/151 (6%)	0/151 (0%)	142/151 (94%)	JUN,IL1RAPL2,TGFB1,PPRC1,RARA,PRKAR2A,ADCY6,TGFB2,PRKCE
TNFR1 Signaling	0.288	0.0638	0/47 (0%)	3/47 (6%)	0/47 (0%)	44/47 (94%)	FOS,MADD,JUN
Altered T Cell and B Cell Signaling in Rheumatoid Arthritis	0.288	0.061	0/82 (0%)	5/82 (6%)	0/82 (0%)	77/82 (94%)	TRAF3,SPP1,HLA-A,TGFB1,HLA-DOB
4-1BB Signaling in T Lymphocytes	0.281	0.0667	0/30 (0%)	2/30 (7%)	0/30 (0%)	28/30 (93%)	JUN,MAPK14
D-myo-inositol-5-phosphate Metabolism	0.279	0.0588	0/153 (0%)	9/153 (6%)	0/153 (0%)	144/153 (94%)	WBP11,DUSP5,DUSP8,PHOSPHO1,PPP1R13B,DOT1L,PIP4K2B,PLCH2,PTPRN
GPCR-Mediated Nutrient Sensing in Enteroendocrine Cells	0.279	0.0602	0/83 (0%)	5/83 (6%)	0/83 (0%)	78/83 (94%)	PRKAR2A,ADCY6,PRKCE,PLCH2,GNG7
Assembly of RNA Polymerase II Complex	0.276	0.0625	0/48 (0%)	3/48 (6%)	0/48 (0%)	45/48 (94%)	TAF4,TAF3,TAF15
NAD biosynthesis II (from tryptophan)	0.269	0.0769	0/13 (0%)	1/13 (8%)	0/13 (0%)	12/13 (92%)	ABL1
Glycogen Degradation III	0.269	0.0769	0/13 (0%)	1/13 (8%)	0/13 (0%)	12/13 (92%)	GAA
MIF-mediated Glucocorticoid Regulation	0.267	0.0645	0/31 (0%)	2/31 (6%)	0/31 (0%)	29/31 (94%)	PLA2G4A,PLA2G2D
T Helper Cell Differentiation	0.263	0.0597	0/67 (0%)	4/67 (6%)	0/67 (0%)	63/67 (94%)	HLA-A,TGFB1,HLA-DOB,BCL6
PI3K/AKT Signaling	0.258	0.0579	0/121 (0%)	7/121 (6%)	0/121 (0%)	114/121 (94%)	TP53,MTOR,CDC37,YWHAG,INPP5J,FOXO1,YWHAE
Neuregulin Signaling	0.253	0.0581	0/86 (0%)	5/86 (6%)	0/86 (0%)	81/86 (94%)	MTOR,CRKL,TGFA,PRKCE,DLG4
NF-κB Activation by Viruses	0.253	0.0581	0/86 (0%)	5/86 (6%)	0/86 (0%)	81/86 (94%)	PIK3C2B,IRS1,FGFR1,PRKCE,IRS2
DNA Double-Strand Break Repair by Homologous Recombination	0.248	0.0714	0/14 (0%)	1/14 (7%)	0/14 (0%)	13/14 (93%)	ABL1
nNOS Signaling in Skeletal Muscle Cells	0.248	0.0714	0/14 (0%)	1/14 (7%)	0/14 (0%)	13/14 (93%)	RYR1
Caveolar-mediated Endocytosis Signaling	0.245	0.058	0/69 (0%)	4/69 (6%)	0/69 (0%)	65/69 (94%)	ITSN1,HLA-A,CAV1,ABL1
Role of MAPK Signaling in the Pathogenesis of Influenza	0.245	0.058	0/69 (0%)	4/69 (6%)	0/69 (0%)	65/69 (94%)	PLA2G4A,MAPK14,PLA2G2D,MAP2K3
GPCR-Mediated Integration of Enteroendocrine Signaling Exemplified by an L Cell	0.245	0.058	0/69 (0%)	4/69 (6%)	0/69 (0%)	65/69 (94%)	PRKAR2A,ADCY6,PLCH2,VIP
CD27 Signaling in Lymphocytes	0.244	0.0588	0/51 (0%)	3/51 (6%)	0/51 (0%)	48/51 (94%)	FOS,JUN,MAP2K3
Cell Cycle Regulation by BTG Family Proteins	0.24	0.0606	0/33 (0%)	2/33 (6%)	0/33 (0%)	31/33 (94%)	CCNE2,E2F4
Complement System	0.24	0.0606	0/33 (0%)	2/33 (6%)	0/33 (0%)	31/33 (94%)	CD46,CFH
Granzyme B Signaling	0.229	0.0667	0/15 (0%)	1/15 (7%)	0/15 (0%)	14/15 (93%)	NUMA1
Granzyme A Signaling	0.229	0.0667	0/15 (0%)	1/15 (7%)	0/15 (0%)	14/15 (93%)	H1FX
Extrinsic Prothrombin Activation Pathway	0.212	0.0625	0/16 (0%)	1/16 (6%)	0/16 (0%)	15/16 (94%)	TFPI
Methionine Degradation I (to Homocysteine)	0.212	0.0625	0/16 (0%)	1/16 (6%)	0/16 (0%)	15/16 (94%)	AHCYL1
Parkinson's Signaling	0.212	0.0625	0/16 (0%)	1/16 (6%)	0/16 (0%)	15/16 (94%)	MAPK14
Dermatan Sulfate Degradation (Metazoa)	0.196	0.0588	0/17 (0%)	1/17 (6%)	0/17 (0%)	16/17 (94%)	CD44
Histamine Degradation	0.196	0.0588	0/17 (0%)	1/17 (6%)	0/17 (0%)	16/17 (94%)	HNMT
